# Supplementary material
Source: publisher figshare collection journal article supplement (https://acs.figshare.com/ndownloader/files/5455640)
Supplement: Supplementary file 1 [file 5455640]

## Supporting Information

**Simple and rapid manipulation of a single circulating tumor cell using visualization of hydrogel encapsulation to facilitate single-cell whole-genome amplification**

*Tomoko Yoshino\*, Tsuyoshi Tanaka, Seita Nakamura, Ryo Negishi, Masahito Hosokawa and Tadashi Matsunaga*

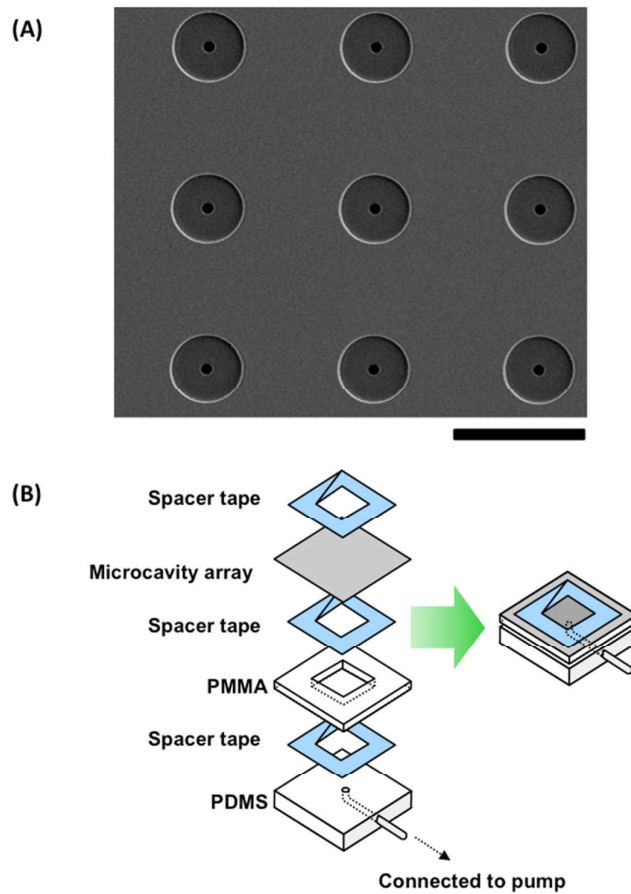

**Fig. S1 CTC recovery device equipped with a microcavity array.** (A) Scanning electron microscope image of the microcavity array. Scale bar: 100  $\mu\text{m}$ . (B) Schematic image of the CTC recovery device.

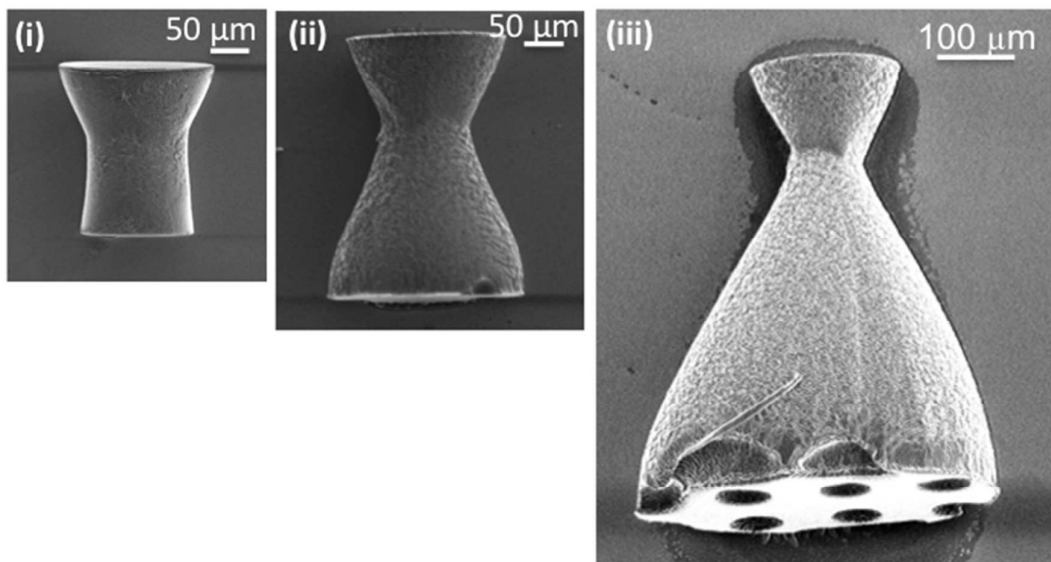

**Fig. S2 SEM images of photopolymerized PEGDA hydrogels varying the distance between the cover glass and microcavity array. The heights were (i) 205  $\mu\text{m}$ , (ii) 327  $\mu\text{m}$ , and (iii) 567  $\mu\text{m}$ .**

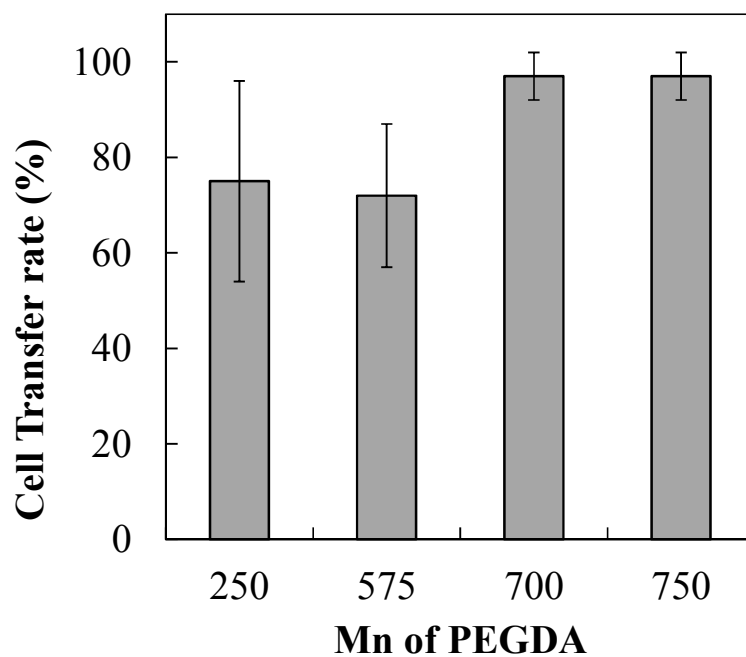

**Fig. S3 Cell transfer rate by using different molecular weight of PEGDA.**

All values are mean  $\pm$  standard deviation of n = 3.

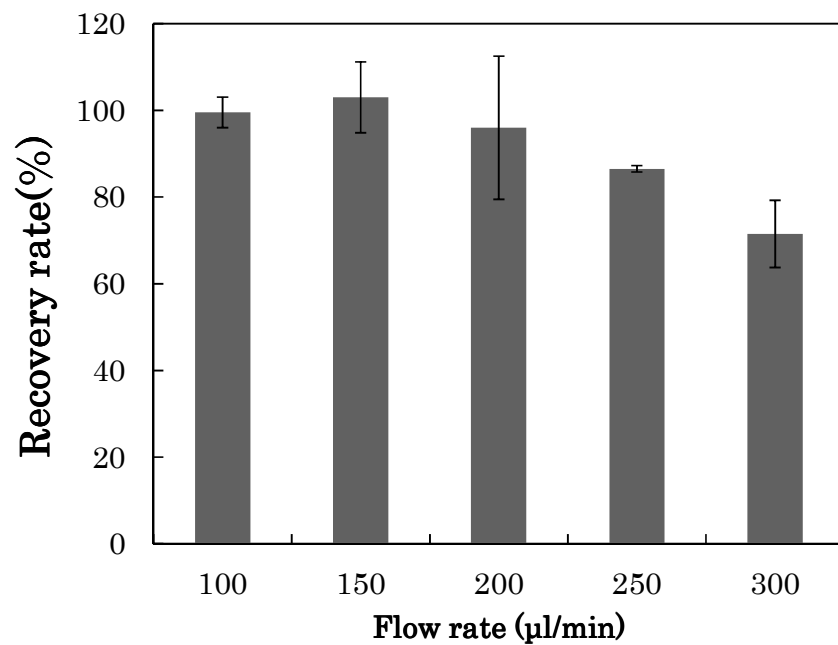

**Fig. S4 Recovery rates of CellTracker Orange Stained NCI-H1975 cells from 100 cells spiked whole blood sample per one milliliter when using microcavity array.**

All values are mean  $\pm$  standard deviation of  $n = 3$ .

Table S1 Evaluation of whole genome amplification (WGA) bias

| Gene name<br>(Chr.)                                                                                       | PIK3CA<br>(3q) | MSH2<br>(2p) | CAT<br>(11p) | P53<br>(17p) | ADCYAP1<br>(18p) | PMS2<br>(7p) | C6orf195<br>(6p) | PTEN<br>(10q) | TOP1<br>(20q) |
|-----------------------------------------------------------------------------------------------------------|----------------|--------------|--------------|--------------|------------------|--------------|------------------|---------------|---------------|
| Single-cell isolated by micromanipulation<br>(Pre amplification : 12 cycles<br>Amplification : 14 cycles) | 3/5            | 1/5          | 1/5          | 5/5          | 5/5              | 5/5          | 5/5              | 5/5           | 5/5           |
| Single-cell encapsulated "on" hydrogel<br>(Pre amplification : 12 cycles<br>Amplification : 14 cycles)    | 5/5            | 0/5          | 2/5          | 5/5          | 4/5              | 3/5          | 3/5              | 4/5           | 4/5           |
| Single-cell encapsulated "on" hydrogel<br>(Pre amplification : 15 cycles<br>Amplification : 17 cycles)    | 5/5            | 0/5          | 3/5          | 5/5          | 5/5              | 5/5          | 4/5              | 4/5           | 3/5           |
